# Supplementary material for: Small organic molecule-mediated hydrothermal synthesis of hierarchical porous hydroxyapatite microspheres by the incorporation of copper ions
Source: Royal Society of Chemistry journal article supplement (doi:10.1039/c7ra08830b), 2017-01-01

### Electronic Supplementary Information

**Supplementary Table 1** Different solutions used for hydrothermal HA preparation

| Products  | Solution | Ca/mmol | Cu/mmol | IP6/ $\mu$ L |
|-----------|----------|---------|---------|--------------|
| Pure-HA   | S0       | 3       | /       | /            |
| IP6-HA    | S1       | 3       | /       | 100          |
| Cu-HA     | S2       | 2.85    | 0.15    | /            |
| Cu-IP6-HA | S3       | 2.85    | 0.15    | 100          |

**Supplementary Fig. S1** The molecular structure of IP6

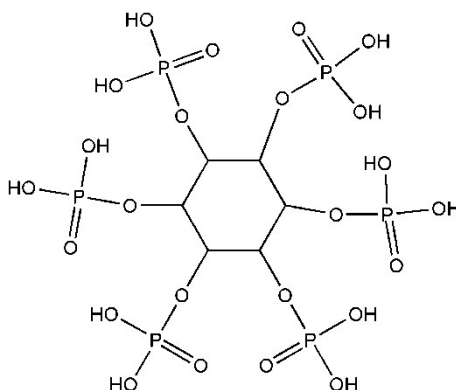

**Supplementary Fig. S2** Nitrogen adsorption-desorption isotherms and the corresponding pore-size distribution curves of the Cu- IP6-HA sample

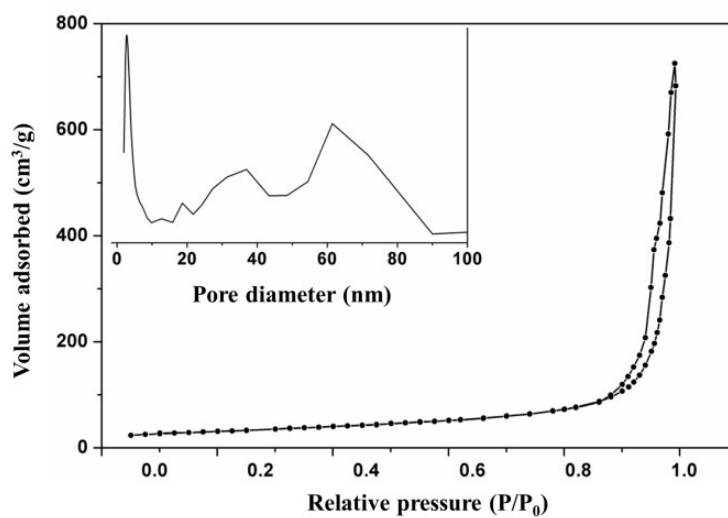

**Supplementary Fig. S3** SEM micrographs of products prepared with different urea concentration

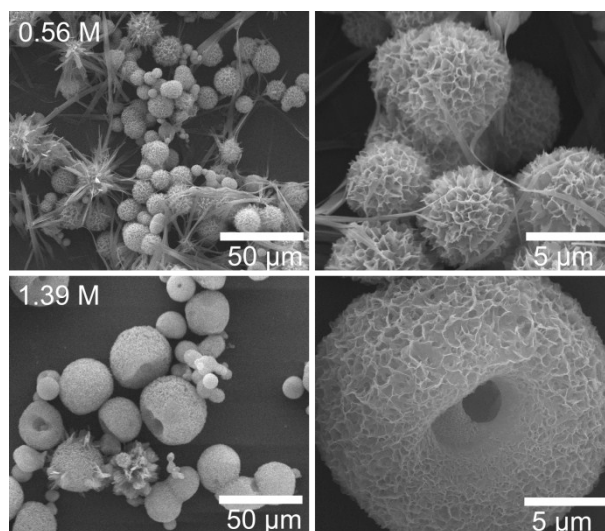

Supplement: c7ra08830b1.pdf [file c7ra08830b1.pdf]
